# Supplementary material
Source: publisher figshare collection journal article supplement (https://tandf.figshare.com/ndownloader/files/13764455)
Supplement: Supplementary file 1 [file 13764455]

**Role of coke-bounded environmentally persistent free radicals in phenanthrene degradation by hydrogen peroxide**

Lan Wua, Song Zhaoa, Kecheng Zhua, Yafang Shia, Xiaofeng Niea, Hanzhong Jiaa,*

a  College of Resources and Environment, Northwest A & F University, Yangling 712100, China.

*To whom correspondence should be addressed.

College of Natural Resources and Environment

Northwest A & F University

3# Taicheng Road, Yangling 712100,China.

Phone: +86-911-3835879

Fax: +86-911-3838957

E-mails: [jiahz@nwafu.edu.cn](mailto:jiahz@nwafu.edu.cn)


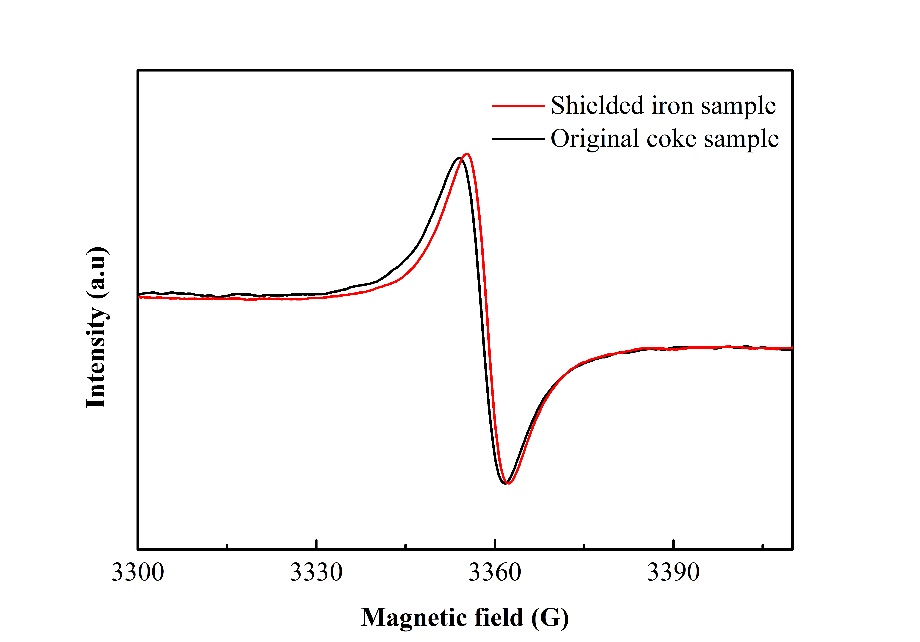


Figure S1. Changes of EPFRs concentration and g value in coke samples with or without Fe removal


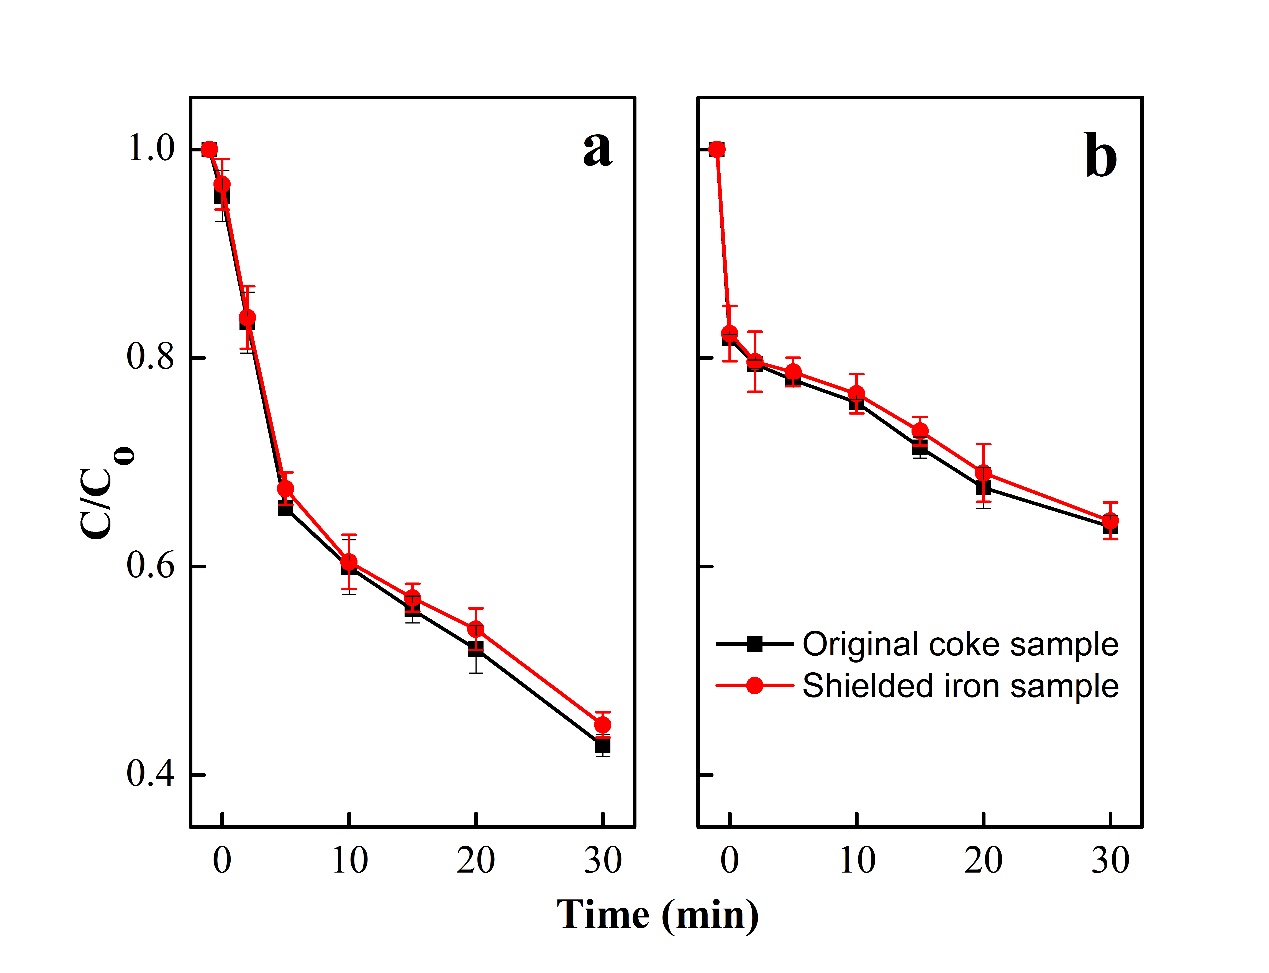


Figure S2. Evolution of PHE before and after coke treatment when the concentration of H2O2 are 250 mM (a) and 1000 mM (b), respectively.


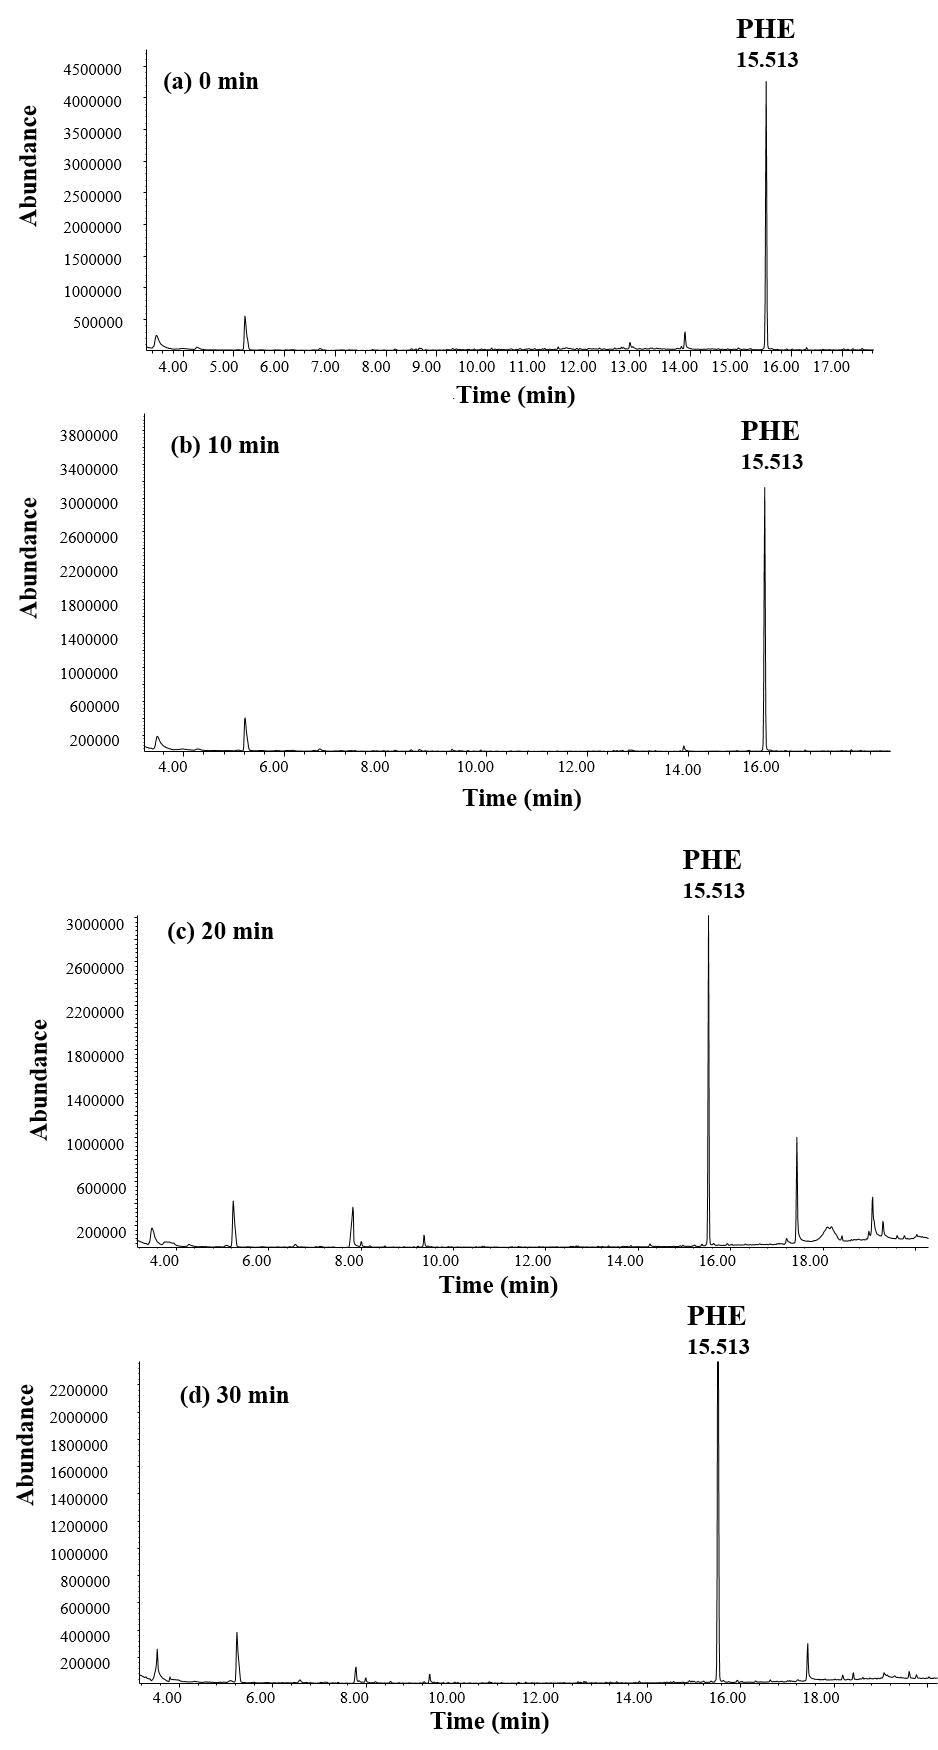


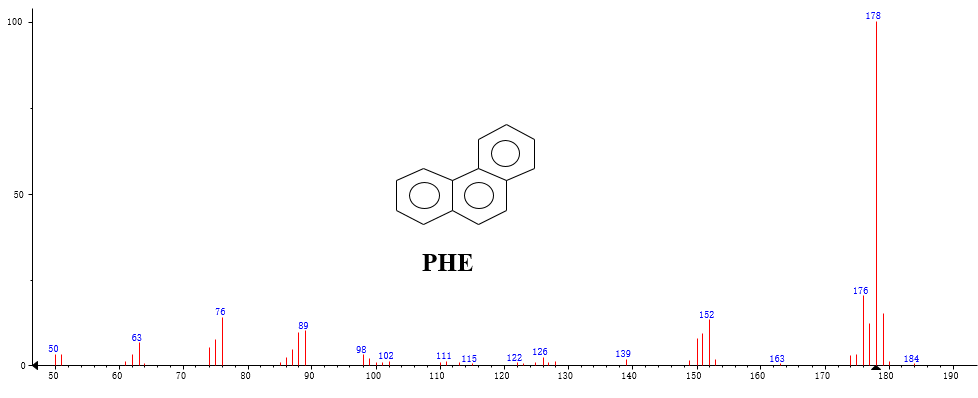


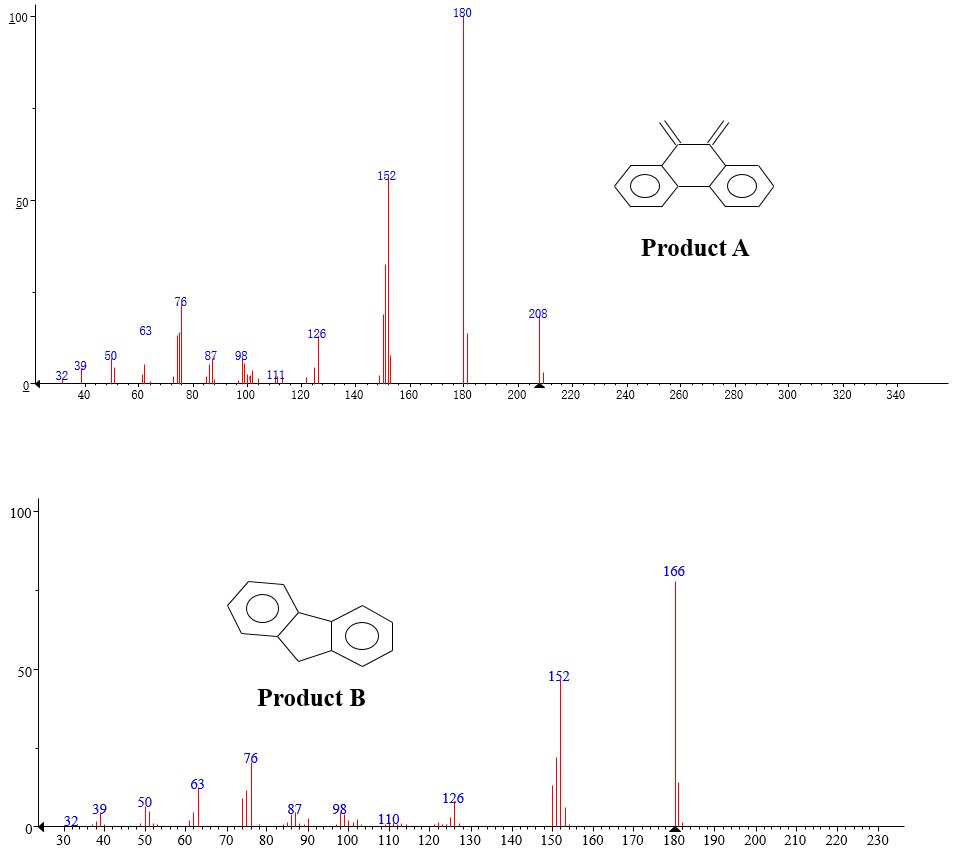


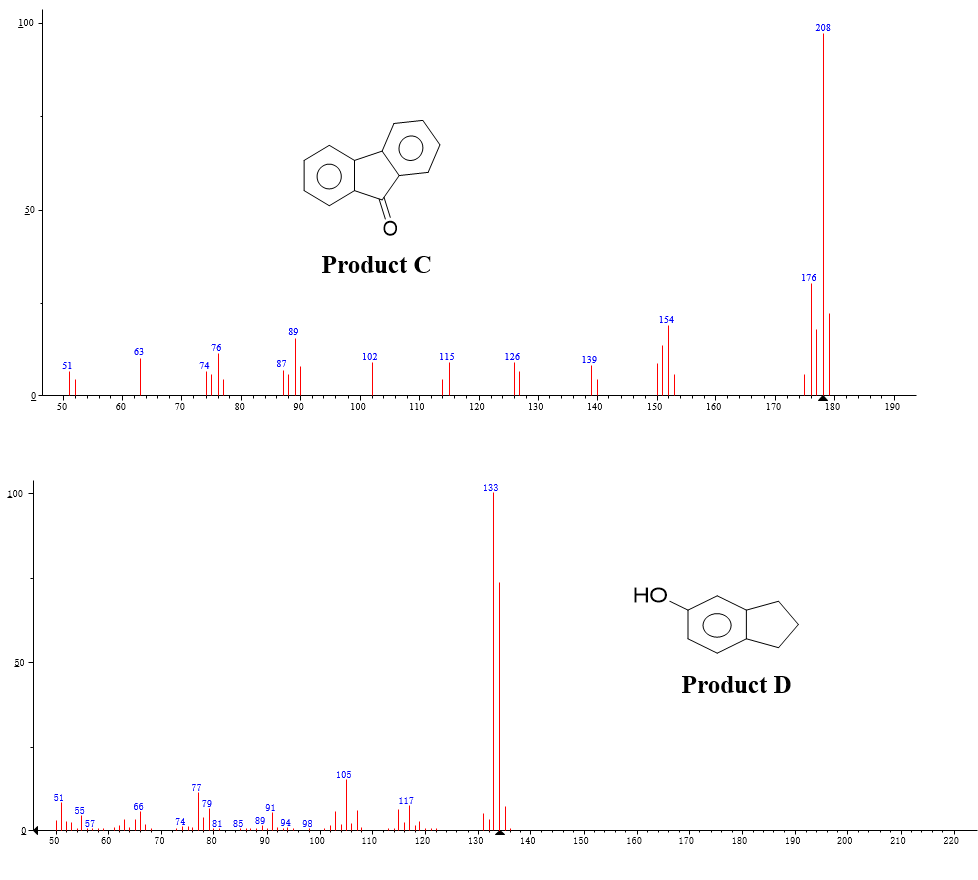


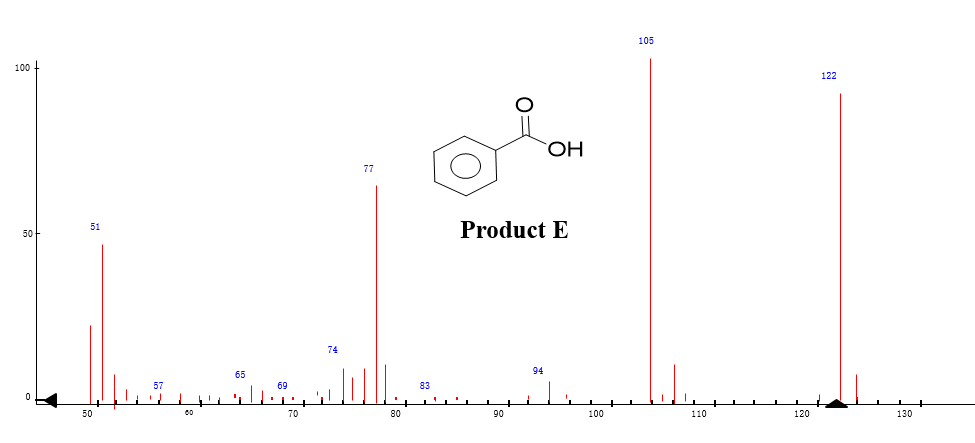


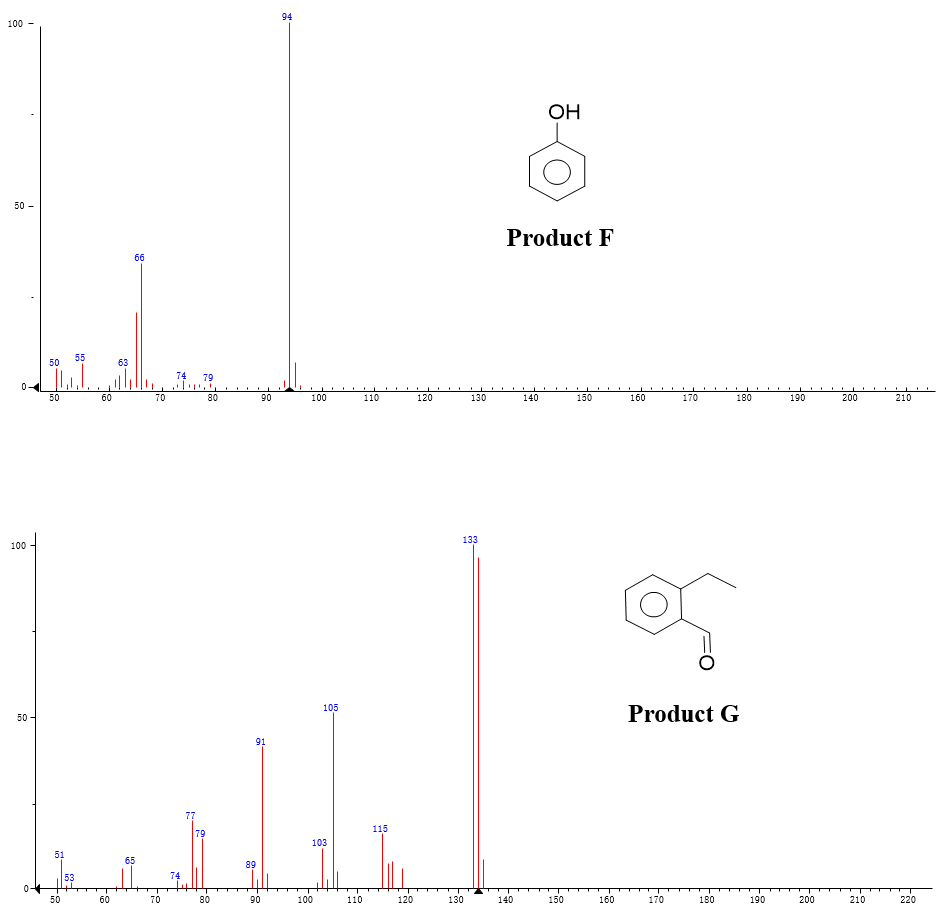


Figure S3. GC-MS chromatograms and mass spectra of products.
